# Supplementary material for: Real time rainfall estimation using microwave signals of cellular communication networks: a case study of Faisalabad, Pakistan
Source: Copernicus journal article supplement (doi:10.5194/hess-2017-740), 2018-01-15
Supplement: Supplementary file [file hess-2017-740-AC5-supplement.pdf]

To the editorial board of HESS

Re: HESS-2017-740 “**Real time rainfall estimation using microwave signals of cellular communication networks: a case study of Faisalabad, Pakistan**”

Dear Christian Chwala

To begin with, I would like to thank you for your consideration of our paper. The comments you have given, made me to reconsider the paper about the title.

Best regards,  
Muhammad Sohail Afzal

**Short Comment (SC1)**

Received and published: 21 March 2018

**Comment 1:**

Your future plans for setting up the real-time system, including the connection to agriculture, sounds very promising. But I guess there are still technical challenges to solve which are not parts of the current manuscript. Hence, I still think that the term "real time" in the title is misleading. The details about your proposed system that you provided in your response seem to give a great outlook, though. It will certainly be very interesting to hear from your real-time system in the future.

*Reply/ Your reservation “Real time” in the title is valid. So we have changed the title and mentioned in the text the prospective of the real time rainfall estimation.*
